# Supplementary material
Source: PubMed Central journal article supplement (PMC6125888)

# Parasite Introduction Level/Distribution

Connectivity

High/Clustered

Low/Dispersed

Connected

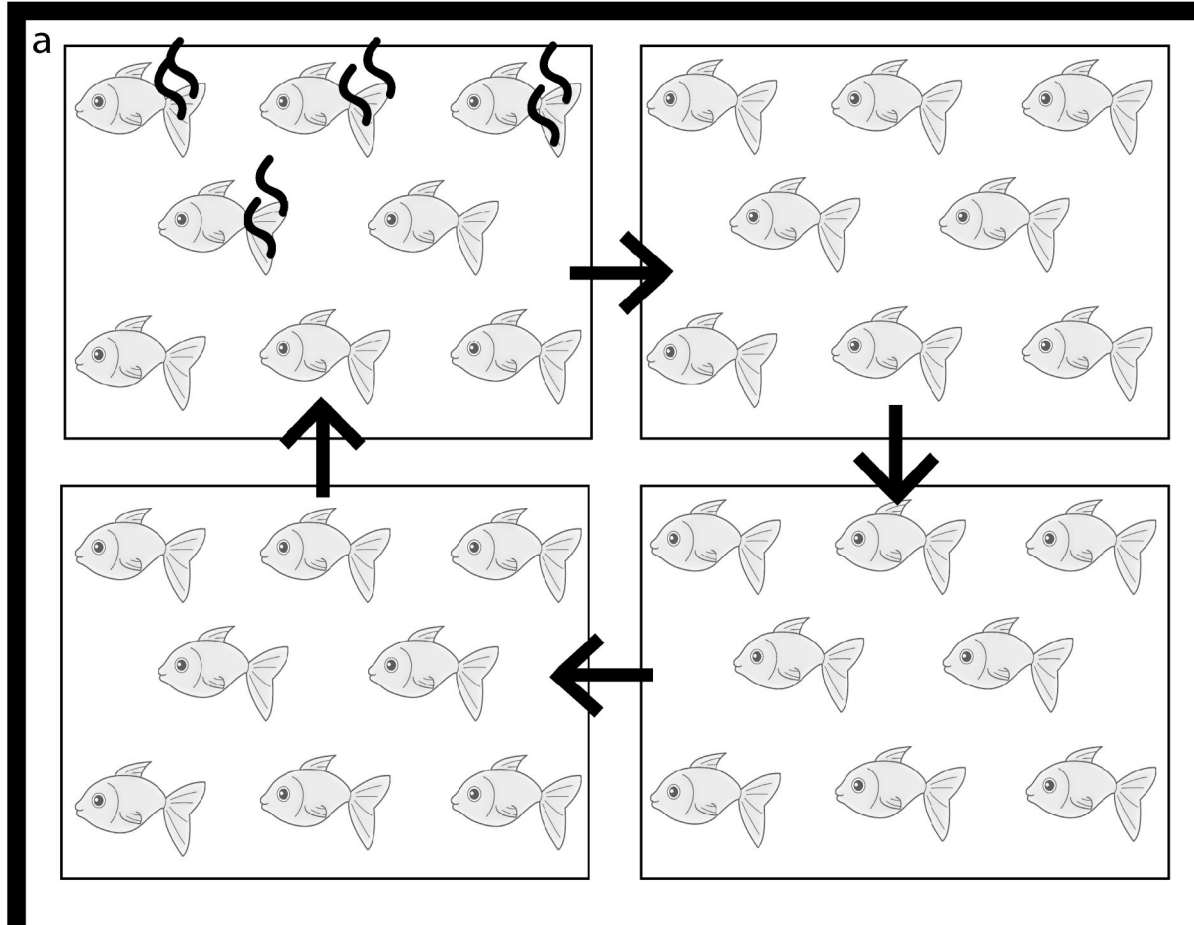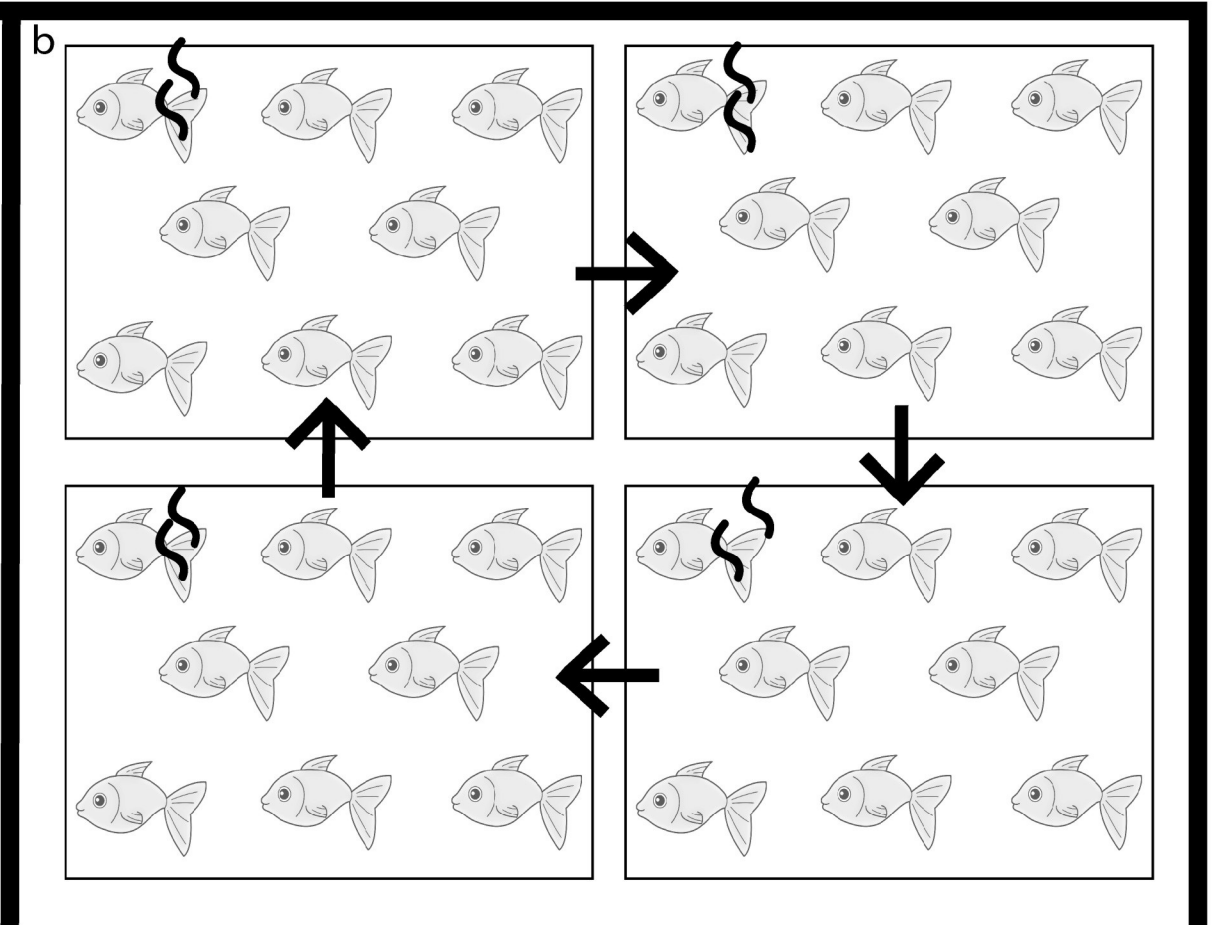

Isolated

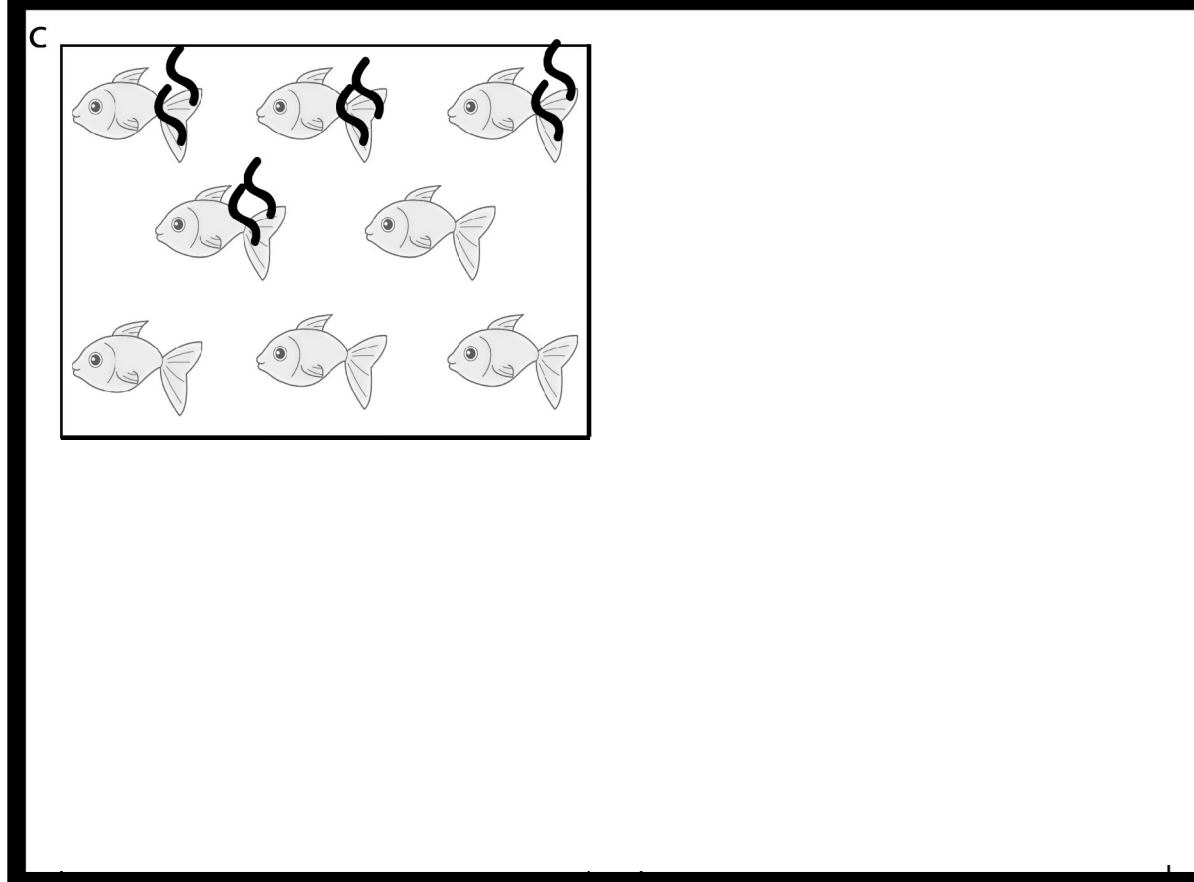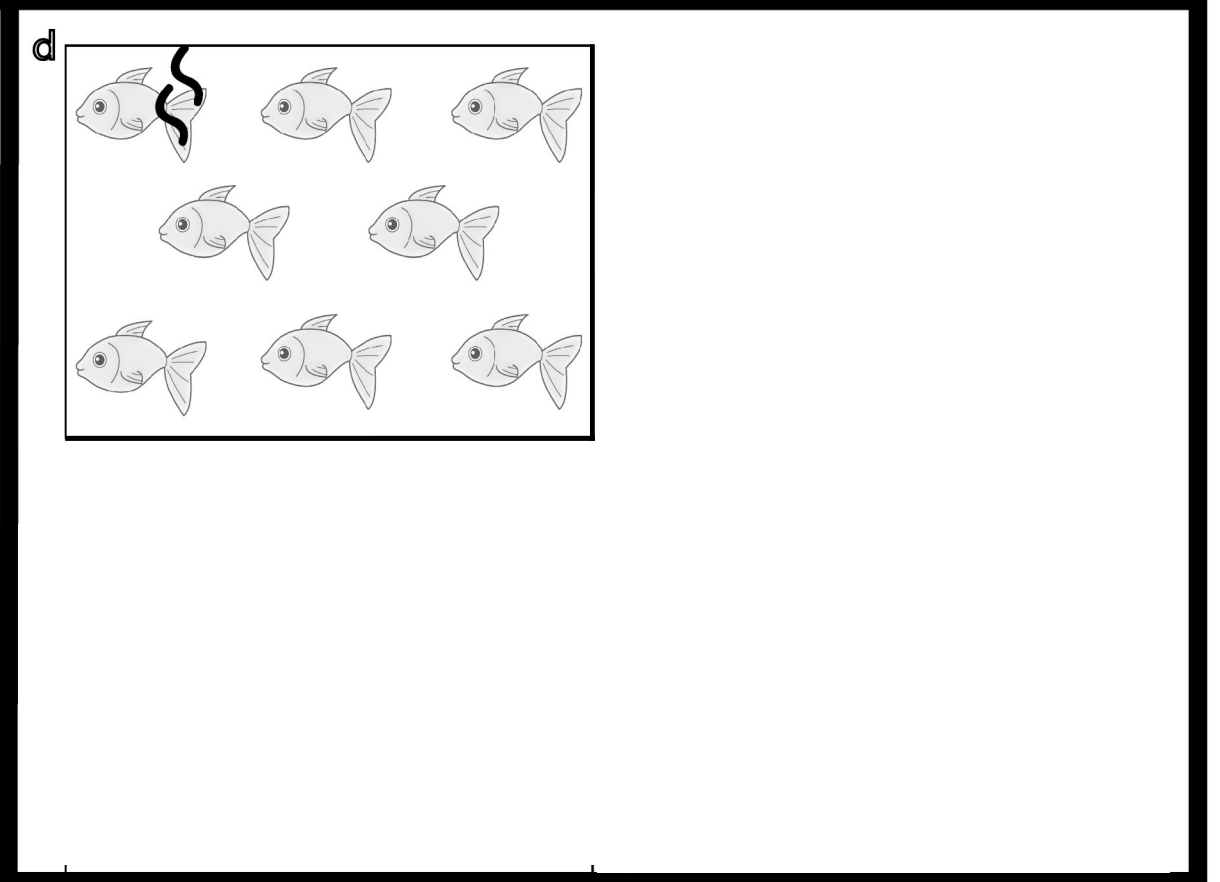

Supplement: rspb20181519supp1.pdf [file rspb20181519supp1.pdf]
